# Supplementary material for: Evolutionary adaptation of DHFR via expression of enzyme isoforms with various binding properties and dynamics behavior: a bioinformatics and computational study
Source: publisher site journal article supplement (doi:10.1515/hsz-2021-0346), 2021-12-14
Supplement: Supplementary file 1 [file j_hsz-2021-0346_suppl.pdf]

# Evolutionary adaptation of DHFR via expression of enzyme isoforms with various binding properties and dynamics behavior: a bioinformatics and computational study

Elaheh Karimi, Emran Heshmati and Khosrow Khalifeh

## Supplementary material

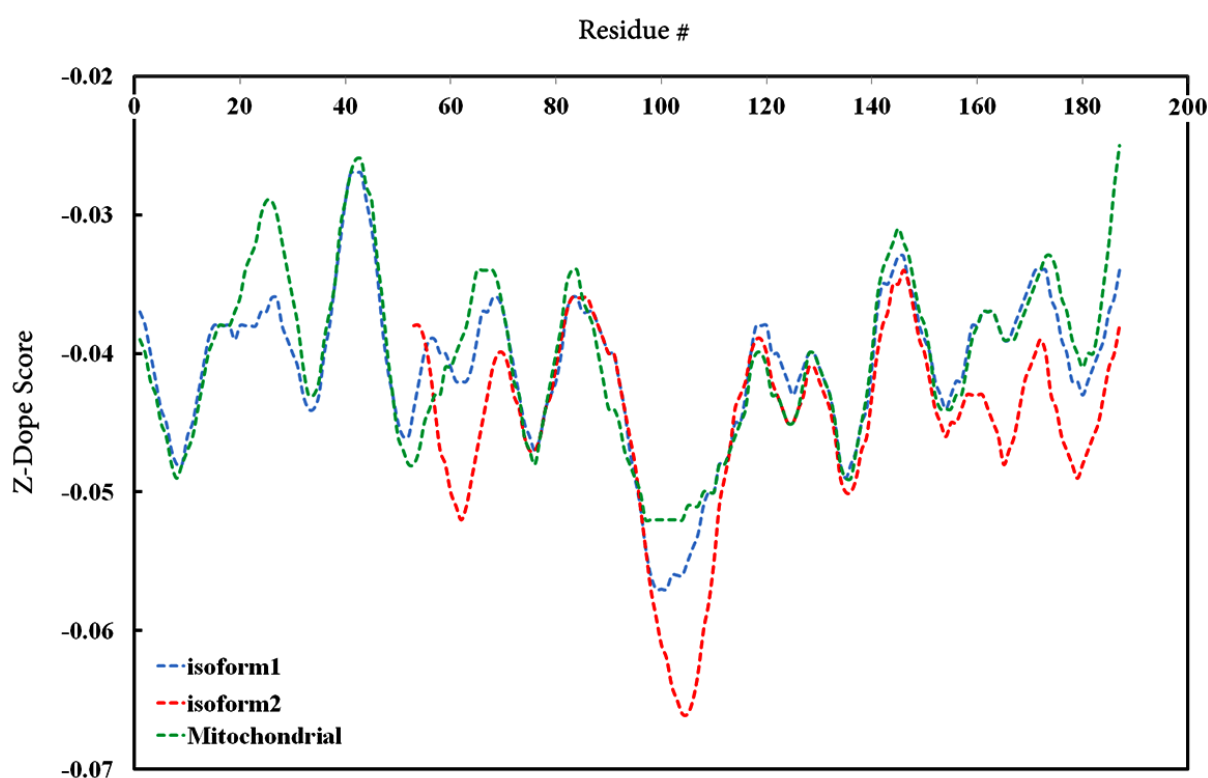

**Supplementary Figure 1.** Z-score of all residues in the structure of proteins.

The score was calculated using MODELLER program by running corresponding command for individual structures.
